# Supplementary material for: Impact of Particle and Crystallite Size of Ba0.6Sr0.4TiO3 on the Dielectric Properties of BST/P(VDF-TrFE) Composites in Fully Printed Varactors
Source: MDPI journal article supplement (doi:10.3390/polym14225027), 2022-11-19
Supplement: s1 [file s1]

# Impact of Particle and Crystallite Size of $\text{Ba}_{0.6}\text{Sr}_{0.4}\text{TiO}_3$ on the Dielectric Properties of BST/P(VDF-TrFE) Composites in Fully Printed Varactors

Tim P. Mach \*, Yingfang Ding and Joachim R. Binder

IAM-ESS, Karlsruhe Institute of Technology, 76344 Eggenstein-Leopoldshafen, Germany

\* Correspondence: tim.mach@kit.edu

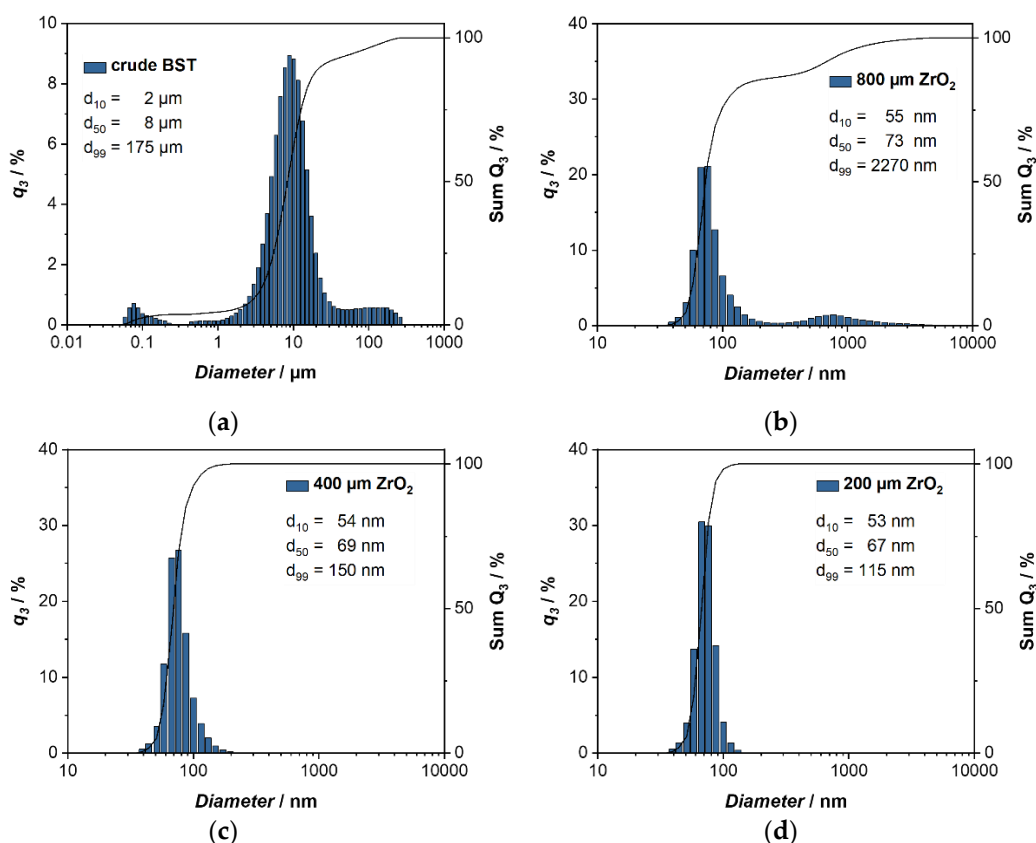

**Figure S1.** Particle size distribution of (a) the crude BST and the suspensions milled with (b) 800  $\mu\text{m}$ , (c) 400  $\mu\text{m}$  and (d) 200  $\mu\text{m}$   $\text{ZrO}_2$  grinding media.

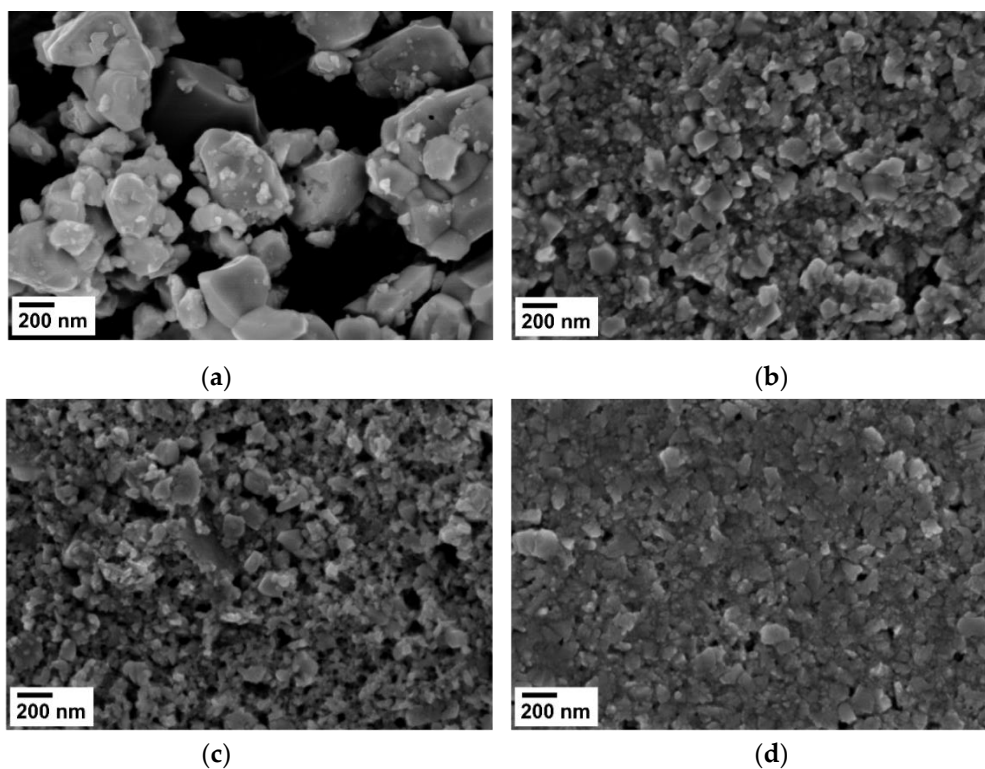

**Figure S2.** SEM images of (a) the crude BST and the powders milled with (b) 800  $\mu\text{m}$ , (c) 400  $\mu\text{m}$  and (d) 200  $\mu\text{m}$   $\text{ZrO}_2$  grinding media.

**Table S1.** Thermal treatment tests ranging from RT and 500 – 1100  $^{\circ}\text{C}$  with crystallite sizes and lattice constants for BST particles milled by 400  $\mu\text{m}$   $\text{ZrO}_2$  grinding media.

| Temperature / $^{\circ}\text{C}$ | Crystallite size / nm | Lattice constant / $\text{\AA}$ |
|----------------------------------|-----------------------|---------------------------------|
| RT                               | $19 \pm 0.2$          | 3.965                           |
| 500                              | $20 \pm 0.1$          | 3.965                           |
| 600                              | $24 \pm 0.2$          | 3.965                           |
| 700                              | $29 \pm 0.2$          | 3.967                           |
| 800                              | $33 \pm 0.3$          | 3.968                           |
| 900                              | $41 \pm 0.5$          | 3.969                           |
| 1000                             | $53 \pm 0.8$          | 3.969                           |
| 1100                             | $73 \pm 1.3$          | 3.970                           |

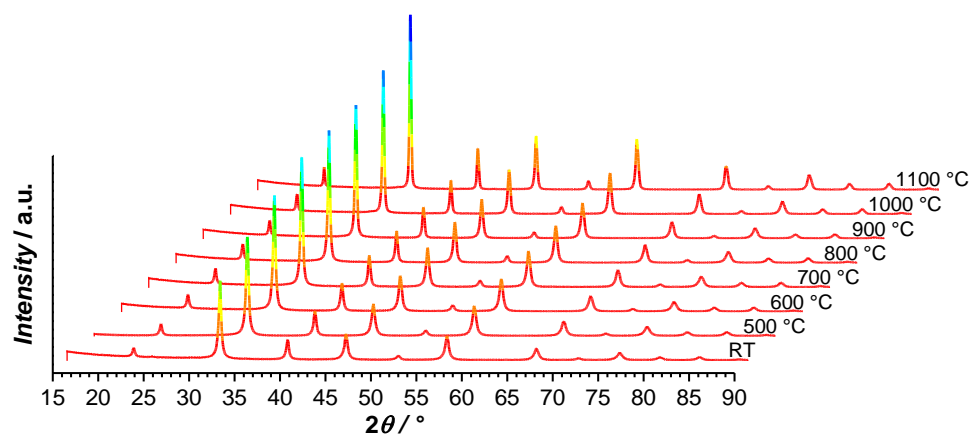

**Figure S3.** XRD data of the thermal treatment tests ranging from RT and 500 – 1100 °C for BST particles milled by 400  $\mu\text{m}$   $\text{ZrO}_2$  grinding media.

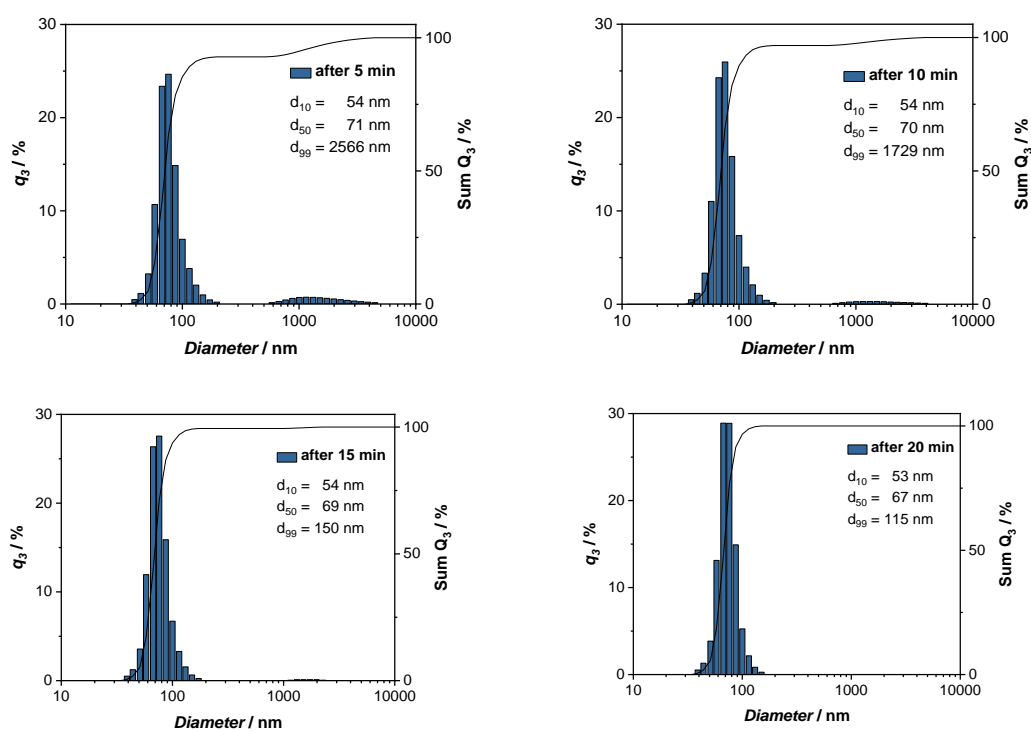

**Figure S4.** Development of the particle size distribution of BST-A1 over time.

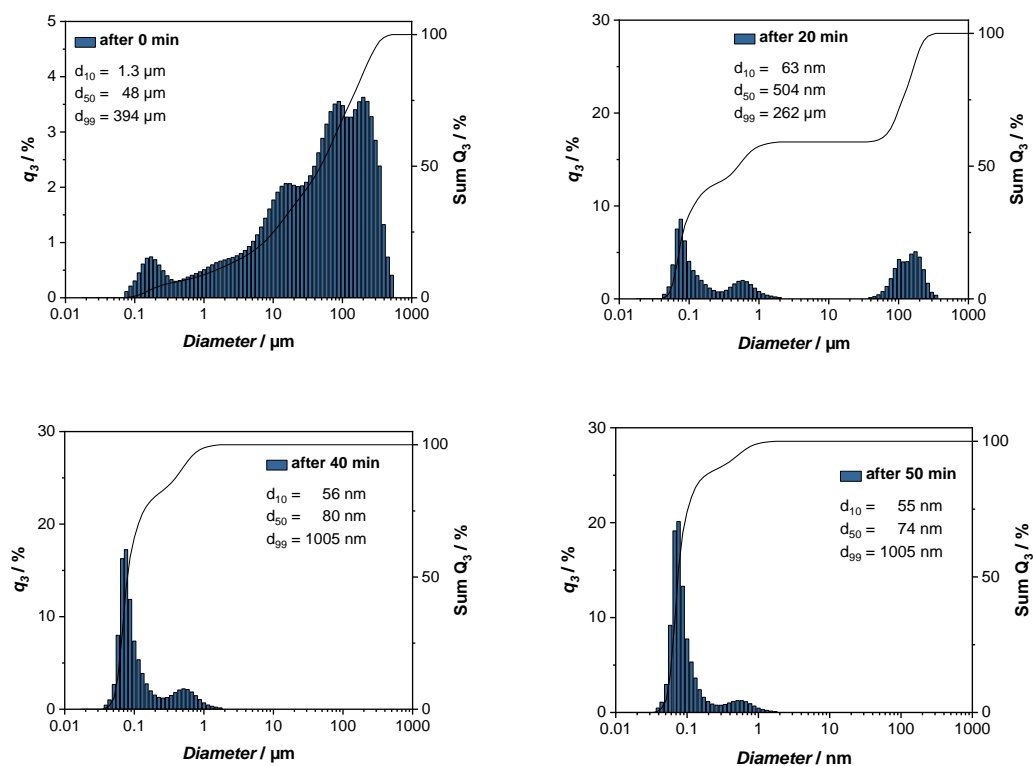

Figure S5. Development of the particle size distribution of BST-C3 over time.

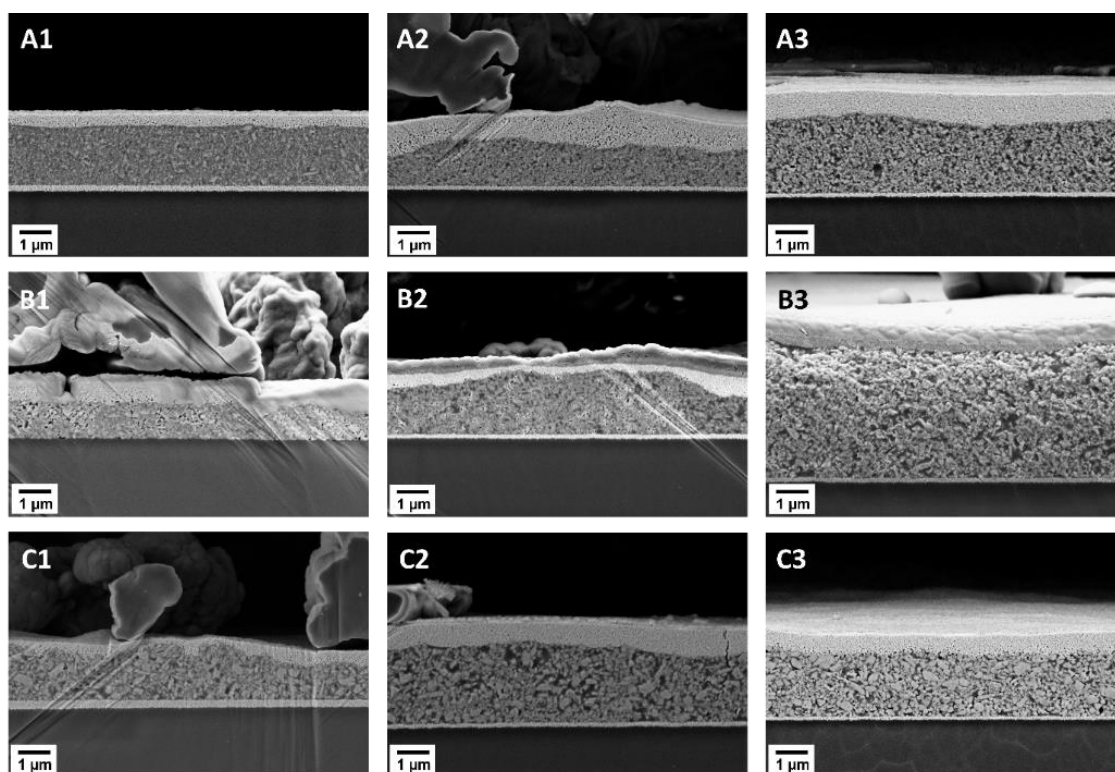

Figure S6. Summary of the cross section of the varactors A1 – C3.

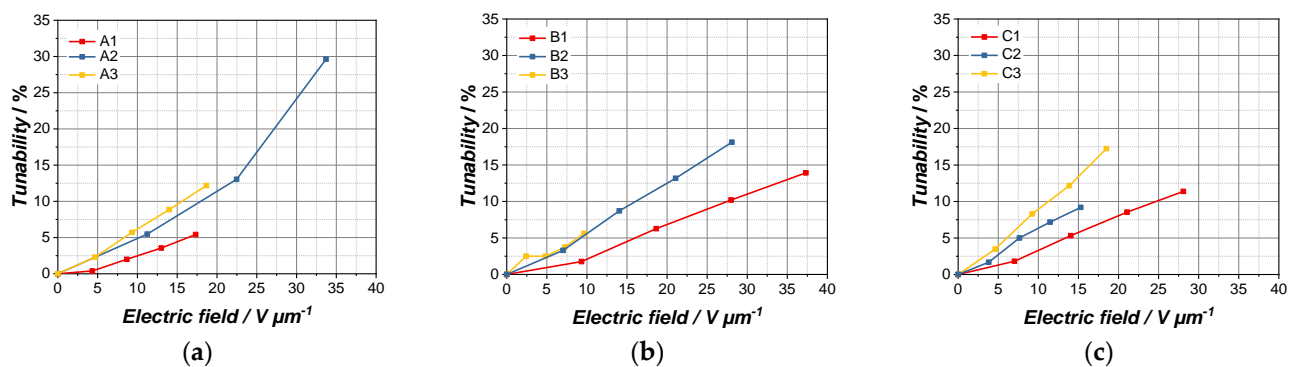

**Figure S7.** Depiction of the tunabilities of the varactors dependent on the electric field for the (a) A-group, (b) B-group and (c) C-group.
